26 **Abstract**

27 Biofilms frequently cause complications in various areas of human life, e.g. in medicine and in the food  
28 industry. More recently, biofilms are discussed as new types of living materials with tuneable  
29 mechanical properties. In particular, *Escherichia coli* produces a matrix composed of amyloid-forming  
30 curli and phosphoethanolamine-modified cellulose fibres in response to suboptimal environmental  
31 conditions. It is currently unknown how the interaction between these fibres contributes to the overall  
32 mechanical properties of the formed biofilms and if extrinsic control parameters can be utilized to  
33 manipulate these properties. Using shear rheology, we show that biofilms formed by the *E. coli* K-12  
34 strain AR3110 stiffen by a factor of two when exposed to the trivalent metal cations Al(III) and Fe(III)  
35 while no such response is observed for the bivalent cations Zn(II) and Ca(II). Strains producing only  
36 one matrix component did not show any stiffening response to either cation or even a small softening.  
37 No stiffening response was further observed when strains producing only one type of fibre were co-  
38 cultured or simply mixed after biofilm growth. These results suggest that the *E. coli* biofilm matrix is a  
39 uniquely structured composite material when both matrix fibres are produced from the same  
40 bacterium. While the exact interaction mechanism between curli, phosphoethanolamine-modified  
41 cellulose and trivalent metal cations is currently not known, our results highlight the potential of using  
42 extrinsic parameters to understand and control the interplay between biofilm structure and  
43 mechanical properties. This will ultimately aid the development of better strategies for controlling  
44 biofilm growth.

45

46 **Keywords**

47 Biofilms, *E. coli*, Rheology, Cations, Composite Materials

48

49 **Table of Contents Graphic**

50

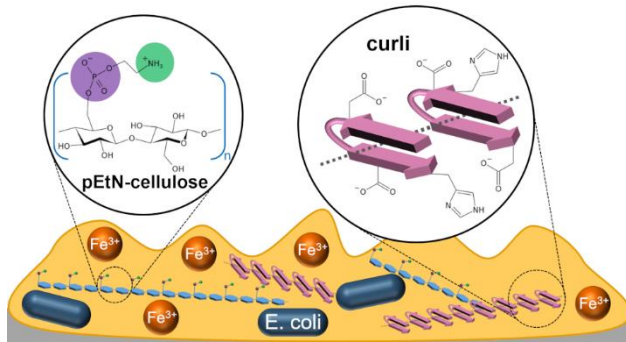

51

52

## 53 Introduction

54 Biofilms are heterogeneous structures made of bacteria embedded in a self-secreted extracellular  
55 matrix. They cause complications in various fields of human life, e.g. in the medical sector,<sup>1</sup> the food  
56 industry<sup>2</sup> and during wastewater treatment.<sup>3</sup> To date, most biofilm research has focused on the  
57 development of preventive anti-biofilm strategies. More recently, biofilms have emerged as a  
58 potential source of sustainable materials. For example, biofilms were utilized for the formation of  
59 cement-like glue,<sup>4</sup> aquaplastics<sup>5</sup> or 3D-printed living materials.<sup>6,7</sup> The composition of the biofilm matrix  
60 and the interaction between matrix components critically determines its mechanical properties. The  
61 matrix mainly consists of polysaccharides,<sup>8</sup> proteins<sup>9</sup> and nucleic acids.<sup>10</sup> The type of protein and  
62 polysaccharide as well as their proportion vary remarkably, both between genera and between  
63 different species within the same genus.<sup>11</sup> Protein-based amyloid fibres are particularly widespread in  
64 microbial biofilms and were, for example, observed in *Pseudomonas sp.*, *Bacillus sp.* and *E. coli*  
65 biofilms, where they are referred to as curli fibres.<sup>12</sup> Curli fibres, encoded by the *csgBA* operon, are  
66 composed of several CsgA units that polymerise onto the CsgB nucleator protein.<sup>13</sup> The second main  
67 component of *E. coli* biofilms is phosphoethanolamine-modified cellulose (pEtN-cellulose).<sup>14</sup> The  
68 matrix of the biofilm-forming *E. coli* K-12 strain AR3110 was estimated to contain 75 % curli and 25 %  
69 pEtN-cellulose.<sup>15</sup>

70 In addition to the matrix composition, also environmental factors influence the mechanical properties  
71 of biofilms. For instance, substrate water content, temperature, pH and nutrients may be utilized as  
72 possible control parameters for tuning *E. coli* biofilm properties.<sup>16,17</sup> Another possible parameter is the  
73 addition of specific metal ions. Metal ions frequently bind to protein or carbohydrate structures in  
74 biological materials,<sup>18</sup> either forming mineralized composite materials<sup>19-22</sup> or sacrificial and self-  
75 healing bonds.<sup>23,24</sup> Bacterial biofilms frequently occur in metallic pipes or at the surface of heavy metal  
76 containing wastewaters, suggesting a possible influence of metal ions on biofilm growth and  
77 properties. For *Enterobacter asburiae*, *Vitreoscilla sp.* and *Acinetobacter lwoffii*, metal ions promote  
78 biofilm formation.<sup>25</sup> In the case of *Staphylococcus epidermidis*, *Bacillus subtilis* and *Pseudomonas*

79 *aeruginosa*, biofilms stiffen in the presence of metal cations.<sup>26</sup> Specifically, *B. subtilis* biofilms stiffen  
80 and erode more slowly in presence of Fe(III) and Cu(II).<sup>27</sup>  
81 In the present work, we focused on *E. coli* biofilms and investigated their viscoelastic properties in the  
82 absence and presence of the bivalent metal cations Zn(II) and Ca(II) as well as the trivalent cations  
83 Al(III) and Fe(III). Performing shear rheology, we compared homogenized biofilm samples where a  
84 solution of a specific metal cation was added and samples where the same volume of water was added  
85 as a control. We further compared the *E. coli* K-12 strain AR3110, which produces biofilms with curli  
86 and pEtN-cellulose, with two closely related strains that synthesize either curli or pEtN-cellulose  
87 fibres.<sup>14,28</sup> Only biofilms that contain both matrix fibres stiffen when incubated with trivalent metal  
88 ions. When strains that produce only curli or pEtN-cellulose are co-cultured or simply mixed, no cation-  
89 induced stiffening is observed, indicating that both matrix fibres need to be produced from the same  
90 bacterial cell. These results suggest the formation of a composite material during matrix production.

91

## 92 **Materials and Methods**

### 93 **Bacterial strains**

94 Three different *E. coli* strains were used to distinguish between the contributions of the two main  
95 matrix fibres to the mechanical biofilm properties and the dependence of these properties on the  
96 presence of metal cations. W3110 is a non-pathogenic K-12 strain<sup>29</sup> that produces curli amyloid fibres  
97 and lacks the ability to synthesize cellulose. Cellulose synthesis, which is encoded in the *bcs* operon,  
98 was restored in the strain AR3110.<sup>28</sup> This W3110-based strain thus produces both curli amyloid fibres  
99 and pEtN-cellulose. To obtain a strain that produces only pEtN-cellulose, curli production was  
100 inactivated in the strain AP329.<sup>14</sup> To test biofilm properties when both curli and pEtN cellulose are  
101 present, but not produced by the same bacterial cell, W3110 and AP329 were combined before  
102 inoculation (co-seeded) or when harvesting the mature biofilms for the rheology experiments (mixed).

103

104

105 **Metal solutions**

106 The following salts were used to probe the influence of trivalent and bivalent cations on biofilm  
107 properties: aluminium chloride hexahydrate (97%; 26726139, Molekuka GmbH), iron(III) chloride  
108 anhydrous (I/1035/50, Fisher Scientific), zinc chloride ( $\geq 98\%$ ) (29156.231, VWR International), calcium  
109 chloride dihydrate ( $\geq 99\%$ ; C3306, Sigma-Aldrich).  $\text{AlCl}_3$ ,  $\text{FeCl}_3$ ,  $\text{ZnCl}_2$  and  $\text{CaCl}_2$  were dissolved in  
110 ultrapure water to a concentration of 220 mM and the pH was measured with a pH-meter (WTW  
111 GmbH; Table 1). Using the  $\text{FeCl}_3$  solution as a reference, a control solution with identical pH was  
112 prepared with hydrochloric acid (1.09057, Merck KGaA). In addition to the pH, the osmolality of the  
113 metal solutions can also influence biofilm properties *via* water intake of the biofilm. The osmolalities  
114 of the different solutions were measured with an osmometer (Osmomat 3000, Gonotec GmbH). The  
115 osmolalities were determined from a calibration curve established from solutions of sodium chloride  
116 (39781.02, Serva Elektrophoresis) (Table 1, Figure S1). Similar to the pH control, a NaCl solution was  
117 prepared that matched the osmolality of the  $\text{FeCl}_3$  solution.

118

119 Table 1. Concentration, pH and osmolality of the four metal solutions  $\text{FeCl}_3$ ,  $\text{AlCl}_3$ ,  $\text{ZnCl}_2$ ,  $\text{CaCl}_2$  and  
120 the NaCl and HCl control solutions.

| Solution               | $\text{AlCl}_3$ | $\text{FeCl}_3$ | $\text{ZnCl}_2$ | $\text{CaCl}_2$ | NaCl | HCl |
|------------------------|-----------------|-----------------|-----------------|-----------------|------|-----|
| Concentration (mM)     | 220             | 220             | 220             | 220             | 409  | 32  |
| pH                     | 2.8             | 1.5             | 5.7             | 5.2             | -    | 1.5 |
| Osmolality (mOsmol/kg) | 895             | 754             | 598             | 618             | 754  | -   |

121

122 **Biofilm growth**

123 For starting the bacterial culture, LB agar plates (Luria/Miller; x969.1, Carl Roth GmbH) were prepared.  
124 A bacterial suspension, grown from glycerol stocks, was streaked onto these agar plates to obtain  
125 microcolonies after overnight culture at 37 °C. One day before starting biofilm growth, two single  
126 microcolonies were separately transferred into LB medium (5 mL; Luria/Miller; x968.2, Carl Roth  
127 GmbH) and incubated overnight at 250 rpm and 37 °C. The  $\text{OD}_{600}$  of the resulting bacteria suspensions

128 was measured after a 10-fold dilution. The suspension where OD<sub>600</sub> was closest to 0.5 was chosen for  
129 inoculating the biofilms. Biofilms were grown on salt-free LB agar plates as media with low osmolarity  
130 promote matrix production.<sup>30</sup> The salt-free LB agar plates were composed of tryptone/peptone ex  
131 casein (10 g L<sup>-1</sup>; 8952.1, Carl Roth GmbH), yeast extract (5 g L<sup>-1</sup>; 2363.1, Carl Roth GmbH) and  
132 bacteriological agar agar (18 g L<sup>-1</sup>; 2266.3, Carl Roth GmbH). On each Petri dish ( $\phi$  = 145 mm), 9 x 5  $\mu$ L  
133 of suspension were inoculated to obtain an array of 9 biofilms. For the “co-seeded” biofilm samples,  
134 OD<sub>600</sub> of the two suspensions was measured and the suspensions were combined such that the final  
135 density of each bacterial strain was identical. Inoculation took place immediately after a short mixing  
136 step. For the “mixed” samples, both bacterial strains were grown on the same agar surface. All biofilms  
137 were grown at 28 °C for 7 days and then stored in the fridge at 5 °C for a maximum of 48 h. Images of  
138 the biofilms were acquired with an AxioZoomV.16 stereomicroscope (Zeiss, Germany).

139

#### 140 **Sample preparation for rheology experiments**

141 Depending on the *E. coli* strain, two or three biofilms (~90 mg) were scraped from the agar surface  
142 and transferred into an empty Petri dish using cell scrapers. For the “mixed” biofilm samples, materials  
143 from both strains were combined in equal proportions. All samples were gently stirred with a pipette  
144 tip and either measured as obtained (neat) or incubated with the desired metal or control solution  
145 (diluted). For the experiments that required the incubation of the biofilm with the respective solution,  
146 the scraped biofilms were stirred with the solution in a ratio of 10:1 (w/v), yielding a final cation  
147 concentration of ~20 mM. After stirring, the Petri dish was sealed with Parafilm and left to incubate  
148 at room temperature for 45 min. For every dilution experiment, two samples from the same agar plate  
149 were measured. One was incubated with the solution of interest and the other sample was incubated  
150 with ultrapure water. To document sample texture, images of the different mixtures were taken with  
151 a 2 megapixel USB camera (Toolcraft Microscope Camera Digimicro 2.0 Scale, Conrad Electronic SE).

152

153

154 **Rheology measurements**

155 The measurements were performed with an oscillatory shear rheometer (MCR301, Anton Paar GmbH)  
156 under stress control. The sample stage was equipped with Peltier thermoelectric cooling and the  
157 temperature was set to 21 °C for all measurements. Once the sample was transferred onto the stage,  
158 a channel around the stage was filled with water and a hood was used to maintain a high humidity  
159 environment. A parallel plate geometry ( $\phi = 12$  mm) was used and the gap was set to 250  $\mu\text{m}$ .

160 To quantify the viscoelastic properties of the biofilm, strain amplitude sweeps were carried out to  
161 determine the linear viscoelastic range (LVE) and to extract the storage ( $G'_0$ ) and loss ( $G''_0$ ) moduli.  
162 The oscillation frequency was set to 10  $\text{rad s}^{-1}$ . The strain amplitude was increased from 0.01 % to  
163 100 % with 7 points per decade and then decreased again. These cycles of ascending and descending  
164 strain amplitude were repeated 3x. One experiment with 3 cycles lasted approximately 45 min. The  
165 data presented in the Results section were extracted from the ascending amplitude sweep in the  
166 second cycle. The first cycle was considered as an additional homogenisation step.

167 To validate the chosen oscillation frequency, frequency sweeps were performed for AR3110 samples.  
168 The strain amplitude was set constant to 0.02 %. The oscillation frequency was decreased step-wise  
169 from 100  $\text{rad s}^{-1}$  to 1  $\text{rad s}^{-1}$  with 7 points per decade. Alternatively, frequency sweeps were also  
170 performed with a frequency increasing from 1 to 100  $\text{rad s}^{-1}$ . This ranges from one order of magnitude  
171 above and below the frequency used for the amplitude sweeps. Frequency sweeps were also  
172 performed over a wider range of frequencies, i.e. from 100 to 0.001  $\text{rad s}^{-1}$ ; however, these  
173 measurements showed excessive drying of the biofilm samples at low frequencies. All frequency  
174 sweeps were carried out with neat biofilms and samples mixed with 10 % (v/w) ultrapure water, and  
175 both preceded or not by a pair of increasing and decreasing amplitude sweeps as previously described.  
176 To validate that sample drying does not affect the data acquired within the second ascending  
177 amplitude sweep, sample properties of AR3110 were recorded for a duration of at least 3 h, using a  
178 low oscillation frequency of 10  $\text{rad s}^{-1}$  and strain amplitude of 0.02 %. This test was also preceded by  
179 a pair of amplitude sweeps (increasing and decreasing strain amplitude) as previously described.



## 180 **Data analysis**

181 To determine biofilm properties, the  $G'$  and  $G''$  values were averaged over a strain range from 0.01 to  
182 0.02 % (3 data points). These values represent the plateau moduli  $G'_0$  and  $G''_0$  of the respective biofilms  
183 (neat samples vs. samples diluted with ultrapure water). For the dilution experiments with solutions  
184 of metal cations, we primarily focussed on the relative difference between moduli. That is, the  
185 modulus of the sample diluted with the solution of interest was corrected by the modulus of a sample  
186 (from the same Petri dish) diluted with ultrapure water. This comparison to a reference sample, grown  
187 under identical conditions, was necessary to account for biofilm sample variability between Petri  
188 dishes.

189 For both moduli, the relative difference was calculated as follows, as exemplary shown for  $G'_0$ :

$$190 \quad \Delta G'_0 = \frac{G'_{0,solution} - G'_{0,water}}{G'_{0,water}}$$

191 For each condition tested, the median was determined ( $n_{pairs} \geq 4$ ) as the data was not normally  
192 distributed. The data is shown in the form of boxplots. The whiskers of the boxplots represent 1.5  
193 times the interquartile range (IQR). To assess whether the relative differences of the moduli show a  
194 significant difference from zero, i.e. the effect of the solution tested differs from that of water, a one-  
195 sample Wilcoxon signed rank test ( $\mu = 0$ ,  $\alpha = 0.05$ ) was performed, using the program R (R Core Team;  
196 version 4.0.5).

197

## 198 **Results**

199 Biofilms that synthesize both curli and pEtN-cellulose (AR3110) showed the typical morphology with  
200 three-dimensional wrinkles (Figure 1).<sup>14</sup> In contrast, the strains producing only curli (W3110) or pEtN-  
201 cellulose (AP329) showed different morphologies in agreement with the literature.<sup>14,28</sup> When co-  
202 seeding W3110 and AP329, the biofilm morphology was similar to AR3110, suggesting that the  
203 structural and mechanical properties of the matrix are at least partly restored in the co-seeded biofilm.

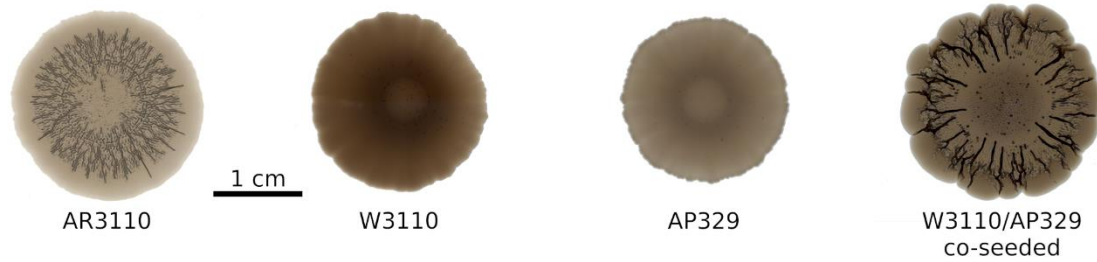

204

205 **Figure 1.** Phenotypes of the different *E. coli* strains. AR3110 produces both curli fibres and pEtN-  
206 cellulose. W3110 expresses only curli, while AP329 synthesizes only pEtN-cellulose. The sample  
207 W3110/AP329 shows the biofilm morphology obtained when W3110 and AP329 were co-seeded, i.e.  
208 when curli and pEtN-cellulose were produced by different bacteria.

209

210 For measuring the viscoelastic properties, the biofilms were harvested and mildly homogenised by  
211 stirring. It has previously been suggested that homogenized *P. aeruginosa* biofilms quickly regain their  
212 viscoelastic properties when probed with shear rheology.<sup>31</sup> Here, homogenisation was necessary to  
213 mix the harvested biofilms with the metal cation solution of interest. As trivalent metal ions, Al(III)  
214 and Fe(III) were chosen for their known effects on the viscoelastic properties of *B. subtilis* and *P.*  
215 *aeruginosa* biofilms. Fe(III) has coordination numbers ranging from 4 to 6,<sup>32</sup> Al(III) has 4 and 6, rarely  
216 5.<sup>33</sup> Zn(II) and Ca(II) were chosen as two bivalent cations with different preferred coordination  
217 numbers (Zn(II): 4-6, Ca(II): 6-8).<sup>32,34</sup>

218

### 219 **Selection of measurement conditions and data range for rheology analyses**

220 Before probing the influence of bivalent and trivalent cations on the mechanical properties of the  
221 different biofilms, we first established the measurement conditions using neat AR3110 biofilms. As  
222 previously stated, the amplitude sweeps consisted of three cycles and the data presented were  
223 extracted from the ascending amplitude sweep in the second cycle (Figure 2A). The plateau values for  
224 both moduli were similar for the three cycles, with no systematic increase or decrease of the values  
225 between the first and subsequent cycles (Figure S2). This confirms that also homogenized *E. coli*

226 biofilms recover their stiffness within a few minutes after yielding, similarly to what was observed for  
227 *P. aeruginosa*.<sup>31</sup>

228 To assess the validity of the strain amplitude sweeps, frequency sweeps were performed. The storage  
229 and loss moduli showed a limited influence of the oscillation frequency over a range from 1 to  
230 100 rad s<sup>-1</sup> (Figure 2B). Similar viscoelastic properties were observed for frequency sweeps with  
231 increasing and decreasing frequency and for samples with and without the addition of 10 % (v/w)  
232 ultrapure water (Figure S3). Consequently, in the amplitude sweeps, the plateau moduli  $G'_0$  and  $G''_0$   
233 were always obtained from the linear viscoelastic range (Figure 2A) at a frequency of 10 rad s<sup>-1</sup>.  
234 Frequencies below 1 rad s<sup>-1</sup> were also tested but the sample showed a strong increase in the values of  
235 both moduli, supposedly due to sample drying (Figure S4).

236 The effect of drying was subsequently investigated in more detail. We focussed on the time window  
237 of the second ascending amplitude sweep, from which the shear moduli were derived. Although the  
238 sample appears to be continuously drying throughout the experiment, the drying effect accounts for  
239 only 10 % of the increase in  $G'_0$  during this period (Figure 2C). Interestingly, the values for both moduli  
240 ( $G'_0 \approx 30$  kPa and  $G''_0 \approx 3$  kPa) are significantly lower than those measured for the *E. coli* strain  
241 MG1655 ( $G'_0 \approx 100$  kPa and  $G''_0 \approx 20$  kPa), which produces a matrix with a different composition (curli  
242 and PGA, a linear polymer of  $\beta$ -1,6-N-acetyl-D-glucosamine).<sup>35</sup>

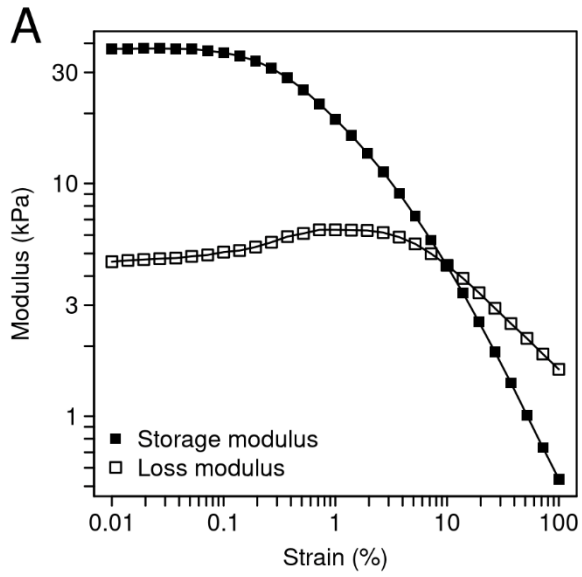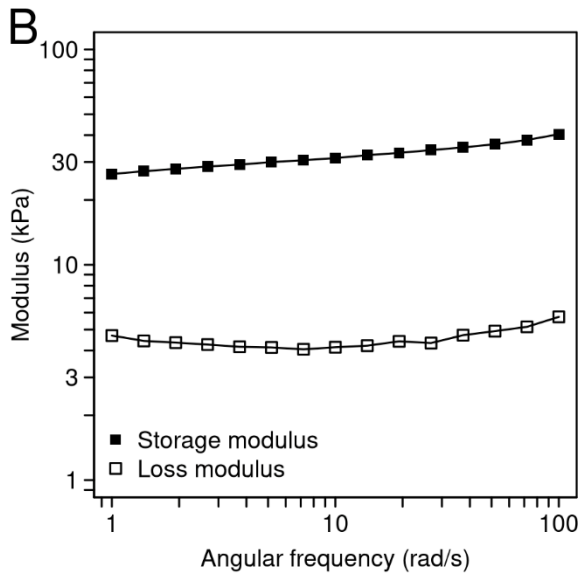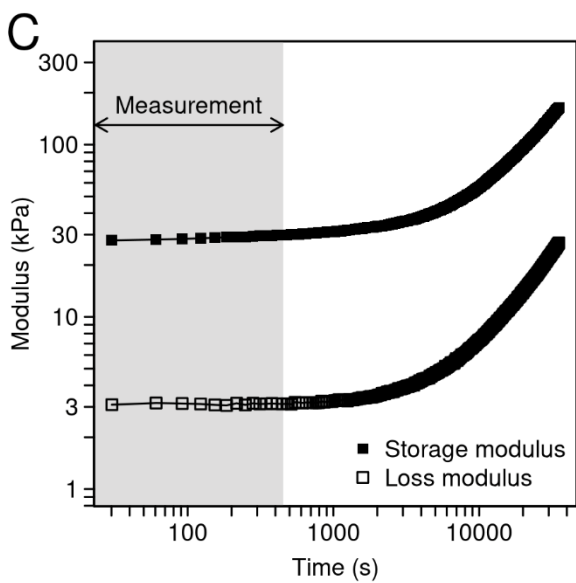

244 **Figure 2.** Viscoelastic properties of AR3110 biofilms, producing both matrix fibres. A) Strain amplitude  
245 sweep ( $\omega = 10 \text{ rad s}^{-1}$ ) of a biofilm where no solution was added. B) Frequency sweep ( $\gamma = 0.02 \%$ ,  
246 decreasing frequency) of a biofilm where no solution was added. C) Evolution of the storage and loss  
247 moduli, measured with constant strain amplitude ( $\gamma = 0.02 \%$ ) and frequency ( $\omega = 10 \text{ rad s}^{-1}$ ). The  
248 biofilms were measured without any solution added and the measurement was preceded by one  
249 amplitude sweep (not shown). The time interval of the analysed ascending amplitude sweep (7.5 min)  
250 is labelled in grey.

251

### 252 **Dispersion of the storage and loss moduli upon dilution**

253 Adding metal ions in solution increases the water content of the biofilm-cation mixture. Changes in  
254 biofilm properties are thus a combined effect from the addition of water and from the respective  
255 metal ion. To disentangle these effects, we first investigated changes in biofilm viscoelasticity in  
256 response to the addition of 10 % (v/w) ultrapure water. In general, both storage and loss moduli  
257 decreased by approximately one order of magnitude. For example, for AR3110 biofilms, the storage  
258 modulus decreased from 30 to 4 kPa (Table 2) and the loss modulus was lowered from 3 to 0.4 kPa  
259 (Table 3). This indicates that the architecture of the biofilm matrix is partially destroyed when the  
260 sample is stirred after the addition of water. This observation relates to results obtained in  
261 *P. aeruginosa* biofilms where the addition of 5 % (v/w) water led to a stiffness decrease of 40 %.<sup>31</sup> In  
262 most cases, the addition of water also increased the dispersion (coefficient of variation) in both moduli  
263 (Tables 2, 3, S1, S2). Considering the overall large dispersion between biofilm samples grown on  
264 different days and as a result of stirring, the following measurements to probe the effect of metal ions  
265 were performed with an internal control. Each metal containing sample was compared to a sample  
266 containing 10 % (v/w) ultrapure water that was grown in the same Petri dish (Figure 3A; Materials and  
267 Methods).

268

269 **Table 2.** Median storage moduli ( $G'_0$ ) before (-) and after (+) dilution of the biofilms with 10 % (v/w)  
 270 ultrapure water ( $n_{\text{experiments}} \geq 3$ ). The  $G'_0$  values of all individual experiments are reported in Table S1.

| Matrix composition                        | Curli pEtN-cellulose |      | Curli pEtN-cellulose |      | Curli pEtN-cellulose (mixed) |     | Curli pEtN-cellulose (co-seeded) |      |       |      |
|-------------------------------------------|----------------------|------|----------------------|------|------------------------------|-----|----------------------------------|------|-------|------|
|                                           | -                    | +    | -                    | +    | -                            | +   | -                                | +    |       |      |
| Water                                     | -                    | +    | -                    | +    | -                            | +   | -                                | +    | -     | +    |
| Median $G'_0$ (Pa)                        | 28267                | 4510 | 16533                | 1580 | 18200                        | 576 | 31267                            | 2673 | 51167 | 5617 |
| Median absolute deviation (MAD) (Pa)      | 4567                 | 863  | 6517                 | 367  | 9043                         | 385 | 4267                             | 1250 | 3233  | 2717 |
| Coefficient of variation (MAD/median) (%) | 16                   | 19   | 39                   | 23   | 50                           | 67  | 14                               | 47   | 6     | 48   |

271

272

273 **Table 3.** Median loss moduli ( $G''_0$ ) before (-) and after (+) dilution of the biofilms with 10 % (v/w)  
 274 ultrapure water ( $n_{\text{experiments}} \geq 3$ ). The  $G''_0$  values of all individual experiments are reported in Table S2.

| Matrix composition                        | Curli pEtN-cellulose |     | Curli pEtN-cellulose |     | Curli pEtN-cellulose (mixed) |    | Curli pEtN-cellulose (co-seeded) |     |      |     |
|-------------------------------------------|----------------------|-----|----------------------|-----|------------------------------|----|----------------------------------|-----|------|-----|
|                                           | -                    | +   | -                    | +   | -                            | +  | -                                | +   |      |     |
| Water                                     | -                    | +   | -                    | +   | -                            | +  | -                                | +   | -    | +   |
| Median $G''_0$ (Pa)                       | 3297                 | 442 | 2047                 | 170 | 2187                         | 61 | 3413                             | 225 | 6390 | 695 |
| Median absolute deviation (MAD) (Pa)      | 1033                 | 83  | 657                  | 14  | 1007                         | 46 | 277                              | 91  | 160  | 149 |
| Coefficient of variation (MAD/median) (%) | 31                   | 19  | 32                   | 8   | 46                           | 75 | 8                                | 40  | 3    | 21  |

275

276

### 277 Effect of trivalent cations on the shear modulus of AR3110 biofilms

278 To address the great variability between samples grown on different Petri dishes, bacteria were always  
 279 seeded such that biofilm material sufficient for two samples could be obtained from the same Petri  
 280 dish. After one week of growth, the biofilms were scraped from the agar. Prior to the rheology

281 measurements, one sample was incubated with ultrapure water, while the other one was incubated  
282 with the solution of interest. This allowed a systematic comparison dish per dish between the samples  
283 incubated with a metal solution and the respective control samples incubated with water (Figure 3A).  
284

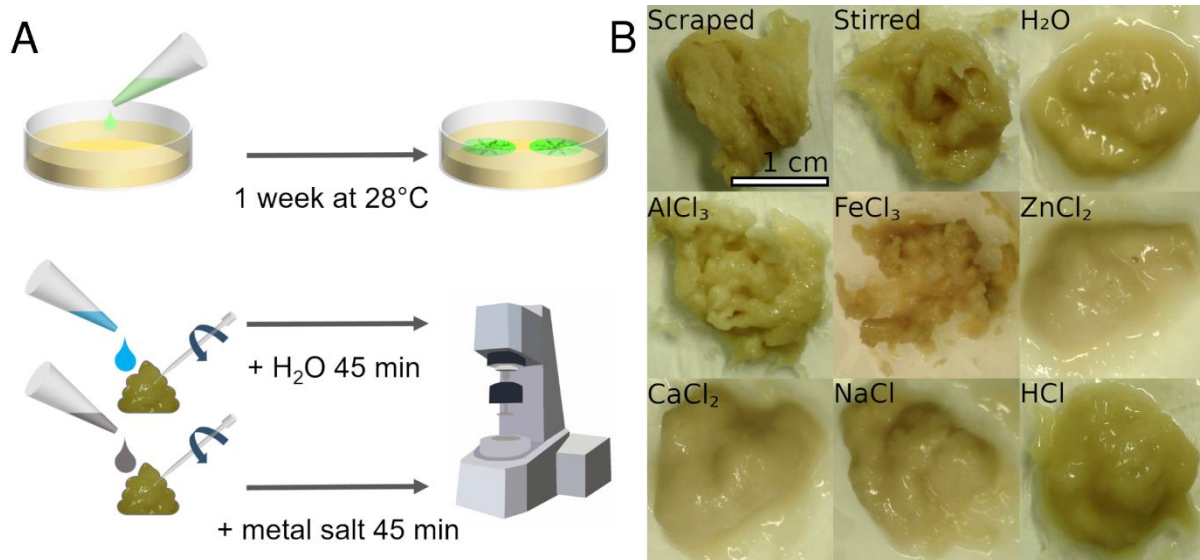

285  
286 **Figure 3.** Sample preparation and texture. A) Biofilms were inoculated on salt-free LB agar and grown  
287 for one week at 28 °C. One Petri dish contained material for two rheology experiments. After  
288 harvesting two samples of the biofilm material, the metal solution of interest was added to one sample  
289 and the sample was gently stirred with a pipette tip. Ultrapure water was added to the second sample,  
290 which was then treated in the same way. Both samples were incubated for 45 min, followed by the  
291 rheology measurements. B) Texture of AR3110 biofilm material after stirring with various solutions.  
292 Biofilms stirred with ultrapure water (H<sub>2</sub>O), with the control solutions or solutions with bivalent metal  
293 cations appear more liquid. In contrast, the samples containing trivalent metal ions show a more solid  
294 textural appearance.

295  
296 Immediately following the addition of the metal ion solutions to AR3110 biofilms, the mixtures  
297 showed a striking difference in their visual appearance (Figure 3B). The texture of biofilms containing  
298 AlCl<sub>3</sub> or FeCl<sub>3</sub> was similar to a granular paste. In contrast, the biofilm mixture appeared more fluid and

299 smooth when ZnCl<sub>2</sub> or CaCl<sub>2</sub> was added. No such difference between bivalent and trivalent cations  
 300 was observed for any other matrix composition.

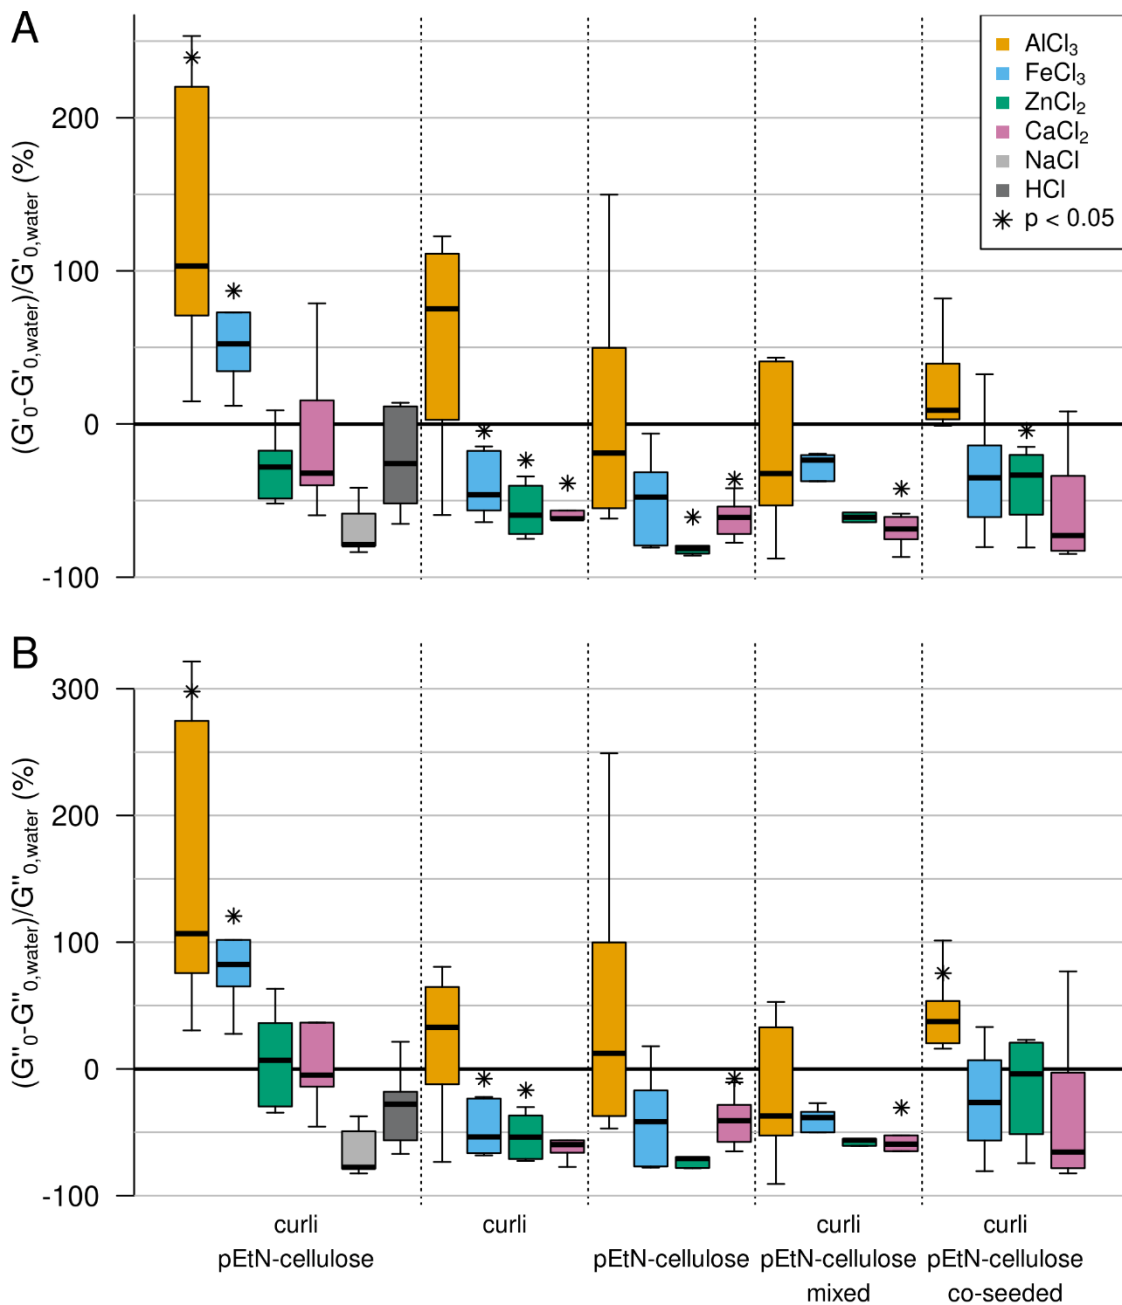

301  
 302 **Figure 4.** Effect of bivalent and trivalent metal ions on *E. coli* biofilms with different matrix  
 303 composition. A) Storage moduli. B) Loss moduli. All samples were stirred with the respective metal  
 304 cation or control solution, adding 10 % (v/w) of the respective solution. The box plots highlight the  
 305 median of  $\geq 4$  independent experiments (see Tables S3-S12 for all values). The whiskers represent  
 306 1.5 times the interquartile range (IQR).



307 To quantify the observed texture changes,  $G'_0$  and  $G''_0$  were determined for all different biofilm  
 308 samples incubated with the different metal ion solutions or the control solutions. Consistent with the  
 309 changes in texture, the moduli also differed when the AR3110 biofilms were mixed with bivalent or  
 310 trivalent metal cations. The addition of  $AlCl_3$  or  $FeCl_3$  increased the storage and loss moduli for AR3110  
 311 (Figure 4). Neither the bivalent metal ions caused an increase in either modulus nor did the control  
 312 solutions that mimicked the pH value or osmolality of the  $FeCl_3$  solution (Figure 4).

313

314 **Table 4.** Statistical significance between the effect of a metal solution on the storage modulus ( $G'$ ) and  
 315 the effect of water. Shown are the p-values calculated from a One-Sample Wilcoxon Signed Rank Test  
 316 ( $\mu = 0$ ) assessing the effect of one solution on  $G'$  for each matrix composition.  $H_0$ : the variation of  $G'$   
 317 does not differ significantly from zero. p-values inferior to 0.05 in bold, in which case an arrow  
 318 indicates whether the modulus increases ( $\uparrow$ ) or decreases ( $\downarrow$ ).

| Matrix composition | Curli pEtN-cellulose    | Curli pEtN-cellulose      | Curli pEtN-cellulose (mixed) | Curli pEtN-cellulose (co-seeded) |
|--------------------|-------------------------|---------------------------|------------------------------|----------------------------------|
| $AlCl_3$           | $\uparrow$ <b>0.001</b> | 0.094                     | 0.844                        | 0.563                            |
| $FeCl_3$           | $\uparrow$ <b>0.031</b> | $\downarrow$ <b>0.031</b> | 0.063                        | 0.063                            |
| $ZnCl_2$           | 0.063                   | $\downarrow$ <b>0.031</b> | $\downarrow$ <b>0.031</b>    | 0.063                            |
| $CaCl_2$           | 0.563                   | $\downarrow$ <b>0.031</b> | $\downarrow$ <b>0.031</b>    | $\downarrow$ <b>0.031</b>        |
| NaCl               | 0.063                   |                           |                              |                                  |
| HCl                | 0.313                   |                           |                              |                                  |

319

320

321

322 **Table 5.** Statistical significance between the effect of a solution on the loss modulus ( $G''$ ) and the effect  
 323 of water. Shown are the p-values calculated from a One-Sample Wilcoxon Signed Rank Tests ( $\mu = 0$ )  
 324 assessing the effect of one solution on  $G''$  for each matrix composition.  $H_0$ : the variation of  $G''$  does

325 not differ significantly from zero. p-values inferior to 0.05 in bold, in which case an arrow indicates  
 326 whether the modulus increases ( $\uparrow$ ) or decreases ( $\downarrow$ ).

| Matrix composition | Curli pEtN-cellulose    | Curli pEtN-cellulose      | Curli pEtN-cellulose (mixed) | Curli pEtN-cellulose (co-seeded) |                           |
|--------------------|-------------------------|---------------------------|------------------------------|----------------------------------|---------------------------|
| AlCl <sub>3</sub>  | $\uparrow$ <b>0.001</b> | 0.563                     | 0.447                        | 0.563                            | $\downarrow$ <b>0.031</b> |
| FeCl <sub>3</sub>  | $\uparrow$ <b>0.031</b> | $\downarrow$ <b>0.031</b> | 0.188                        | 0.063                            | 0.313                     |
| ZnCl <sub>2</sub>  | 0.563                   | $\downarrow$ <b>0.031</b> | 0.063                        | 0.063                            | 0.563                     |
| CaCl <sub>2</sub>  | 1                       | 0.063                     | $\downarrow$ <b>0.031</b>    | $\downarrow$ <b>0.031</b>        | 0.219                     |
| NaCl               | 0.063                   |                           |                              |                                  |                           |
| HCl                | 0.188                   |                           |                              |                                  |                           |

327  
 328 Although statistically significant (Tables 4 and 5), the increase in stiffness ( $G'_0$ ) was smaller than what  
 329 was observed for other bacteria species. For example, Fe(III) and Al(III) lead to a 100-fold increase of  
 330 the storage modulus of *P. aeruginosa* biofilms.<sup>31</sup> Moreover, a range of bivalent and trivalent metal  
 331 cations increased the storage modulus of *B. subtilis* biofilms by several orders of magnitude. Such  
 332 discrepancies in the magnitude of the observed stiffening might be due to the differences in sample  
 333 preparation and in matrix composition. Indeed, in the case of *P. aeruginosa*, only 5 % (v/w) solution  
 334 was added,<sup>31</sup> i.e. less than in our case (10 %). In *B. subtilis*, the final metal concentration in the biofilm  
 335 was 0.25 M,<sup>36</sup> whereas it was 0.02 M in our case. Moreover, the biofilm matrix of the *P. aeruginosa*  
 336 PAO1 strain contains at least three polysaccharides (alginate, Psl, and Pel)<sup>37</sup> and the *B. subtilis* B-1  
 337 strain produces mainly  $\gamma$ -polyglutamate, which both differ from the curli and pEtN-cellulose found in  
 338 the *E. coli* biofilm matrix.  
 339 The effect induced by Fe(III) also depends on the matrix composition (Figure 4). While the ferric salt  
 340 caused a stiffening of the biofilm sample containing curli and pEtN-cellulose fibres (+50 % in  $G'_0$ ), it  
 341 caused a softening (-50 % in  $G'_0$ ) for the matrix composed of curli fibres only and no statistically  
 342 significant effect for the matrix composed of pEtN-cellulose. The effect remained unclear for the co-

343 seeded and mixed biofilms. The bivalent ions caused a significant decrease (>50 %) in  $G'_0$  for the  
344 matrices containing only one type of fibre (Figure 4) while no such effect was observed for the AR3110  
345 strain producing both fibres. One possible explanation for the decrease in stiffness observed for most  
346 matrix-metal combinations is a non-specific osmotic effect caused by the addition of the ionic solution.  
347 The Fe(III) - and Al(III)-induced net stiffening of the AR3110 matrix overrules this softening observed  
348 in all other samples. This suggests that the curli and pEtN cellulose fibres co-produced by AR3110  
349 bacteria form a composite material with a built-in response to trivalent ions.

350

## 351 **Discussion**

352 Using shear rheology, we examined how the viscoelastic properties of *E. coli* biofilms vary under the  
353 influence of metal cations. We probed biofilms formed by different *E. coli* strains that produce pEtN-  
354 cellulose and/or curli fibres. While the shear modulus generally decreased in the presence of metal  
355 solutions, it specifically increased when trivalent cations were added to a biofilm made from bacteria  
356 that co-produced both fibres. Metal cations trigger the formation of biofilms in *Enterobacter asburiae*,  
357 *Vitreoscilla sp.* and *Acinetobacter lwoffii*.<sup>25</sup> Moreover, biofilms produced by *Bacillus subtilis*,  
358 *Pseudomonas putida* and *Shewanella oneidensis* allow for the biosorption of metal ions.<sup>38</sup> In *E. coli*  
359 biofilms, the greatest biosorption performance was observed for Fe(III) when compared to Cd(II), Ni(II)  
360 or Cr(VI) but biofilm mechanical properties were not investigated.<sup>39</sup> In other species, changes in  
361 mechanical biofilm properties were observed,<sup>26</sup> revealing that the same ion can have opposite effects  
362 in different bacterial species. While Cu(II) reinforces *B. subtilis* B-1 biofilms, it weakens those produced  
363 by *P. aeruginosa*.<sup>31,36</sup> This suggests a specific interplay between matrix composition and the type of  
364 ion. In a strain of *B. subtilis* producing a multi-component matrix, however, the effect of metal cations  
365 on the biofilm viscoelastic properties did not seem to be dictated by any specific matrix component.<sup>27</sup>  
366 To interpret the present results, a molecular understanding of the possible interaction of trivalent  
367 cations with the matrix fibres is required. To our knowledge, no data is available concerning the  
368 interaction of Al(III) or Fe(III) with pEtN-cellulose. Yet, it was demonstrated that phosphorylation of

369 cellulose nanofibers significantly enhances their adsorption capacity of Fe(III) ions.<sup>40</sup> Most  
370 interestingly, phosphorylated bacterial cellulose has a much stronger affinity for Fe(III) ions than for  
371 Zn(II), in particular in acidic solutions.<sup>41</sup> It was also shown that Fe(III) ions exhibit tetrahedral  
372 coordination when bound to hydroxyethyl cellulose or carboxymethyl cellulose.<sup>42</sup> Tetrahedral  
373 coordination is the second most common geometry for Fe(III) after octahedral, but it is also the most  
374 common coordination geometry for Zn(II).<sup>32</sup> This may suggest that the overall charge is more  
375 important than the coordination geometry.

376 Equally little information is available about the interaction between metal cations and amyloid curli  
377 fibres. It was demonstrated that curli fibres sequester Hg(II) ions, suggesting a possible general ability  
378 to bind metal cations.<sup>43</sup> More broadly, the interaction between metal cations and other amyloid-  
379 forming structures was widely investigated. This includes amyloid beta (A $\beta$ ) peptides, which are the  
380 main components of amyloid plaques responsible for Alzheimer's disease. While Fe(III), Al(III) and  
381 Zn(II) co-localise with A $\beta$  in senile plaques, their influence on the *in vitro* formation of amyloid fibrils  
382 differs. Zn(II) inhibits the formation of  $\beta$ -sheets while both trivalent cations trigger or stabilise them.<sup>44</sup>  
383 3D-models have shown that Al(III) is almost always hexacoordinated and interacts with aspartate and  
384 glutamate residues in A $\beta$ -complexes.<sup>45</sup> Zn(II) coordinates four to six ligands in A $\beta$ -complexes, including  
385 three histidines as well as one aspartate and/or glutamate residue.<sup>46</sup> Although there is a lack of  
386 structural studies on Fe(III)-coordination to A $\beta$ ,<sup>47</sup> ferric ions bind histidine more efficiently than Zn(II).<sup>48</sup>  
387 A 3D-structure prediction of the major curlin subunit CsgA (AlphaFold; Figure 5) reveals close proximity  
388 of several surface-exposed histidine, glutamate and aspartate residues, suggesting that several  
389 residues are available for metal coordination.<sup>49,50</sup>

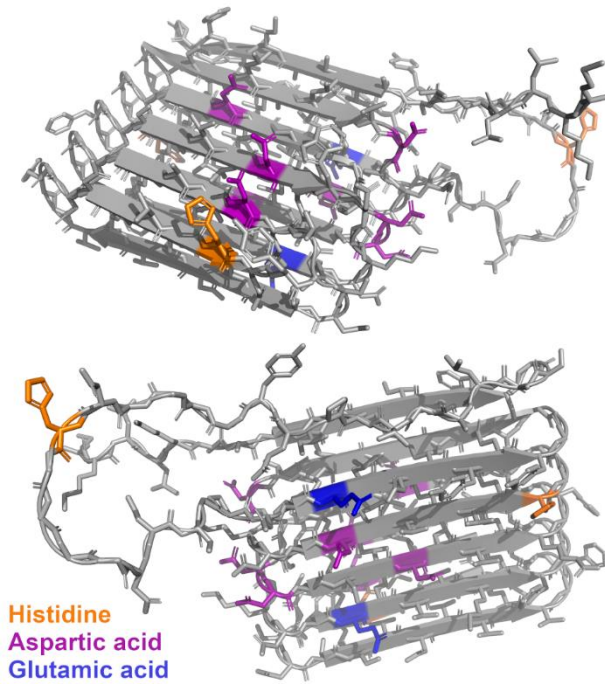

**Figure 5.** Tertiary structure of CsgA, the major curlin subunit, as predicted by AlphaFold (top and bottom view). Amino acids known to be involved in metal coordination are highlighted as follows: orange - histidine, purple - aspartic acid, blue - glutamic acid.

While our results point towards a determining role of the matrix, they do not allow us to exclude a possible effect of the metal ions on the bacteria themselves. Since metal ions trigger biofilm formation in various species,<sup>25</sup> matrix production may be regulated by the presence of metal ions. Considering the timescale of our experiments, altered expression of matrix components is considered to play a minor role, however. Bacteria may further respond to reduce a possible toxic effect of heavy metal ions. For planktonic *E. coli* cells, it was shown that Fe(III) and Al(III) in a concentration of 0.01 mM reduce the number of colony forming units by 50 %.<sup>51</sup> While it appears likely that biofilms provide protection against heavy metal toxicity, as demonstrated for *P. aeruginosa*,<sup>52</sup> it cannot be fully neglected that these cations also have an effect on *E. coli* cells in biofilms. It is reasonable to assume, however, that the viscoelastic biofilm properties are not significantly altered by the appearance of non-viable bacteria as bacterial cells can most likely be considered as particles in a composite material.

406 Most importantly, toxicity would affect all strains equally while we observe a clear difference between  
407 strains producing different matrix fibres.

408

## 409 **Conclusions**

410 Investigating the influence of Fe(III), Al(III), Zn(II) and Ca(II) on the viscoelastic properties of *E. coli*  
411 biofilms, we observed a slight stiffening in the presence of trivalent cations. This stiffening only  
412 occurred for the strain that produced a matrix composed of both pEtN-cellulose and curli amyloid  
413 fibres. Derivatives of bacterial cellulose as well as amyloid-forming structures are known to bind metal  
414 cations; however, no molecular level information is currently available about the interaction of *E. coli*  
415 produced pEtN-cellulose and curli fibres. Considering that stiffening only occurs when both fibres are  
416 co-produced by one and the same bacterial cell, it is highly likely that the trivalent cations  
417 simultaneously interact with both components. Further research is required to unravel the molecular  
418 interactions that underlie this highly selective and specific biofilm stiffening. Towards this goal,  
419 experiments with purified and/or synthetic matrix components may provide mechanistic insights into  
420 the cation-matrix interaction. These experiments will further allow for probing the role of the  
421 phosphoethanolamine modification. Ultimately, the present work and the proposed follow-up studies  
422 will pave the way for new strategies to control biofilm viscoelastic properties without the need for  
423 genetic engineering, a topic of interest for both biofilm prevention and biofilm-based materials  
424 engineering.

425

## 426 **Acknowledgments**

427 The authors thank Prof. Dr. Regine Hengge and Dr. Diego O. Serra for kindly providing the *E. coli* strains  
428 used in this work, Christine Pilz-Allen and Reinhild Dünnebacke for technical support in the  
429 laboratories, Dr. Angelo Valleriani for help with statistics, Geonho Song with rheology, Ricardo Ziege  
430 with microscopy and Wenbo Zhang with osmometry. We further thank the International Max Planck  
431 Research School (IMPRS) on Multi-Scale Biosystems for funding and support as well as Peter Fratzl and

432 the members of the Biofilm-based Materials and the Mechano(bio)chemistry research groups (Max  
433 Planck Institute of Colloids and Interfaces) for inspiring discussions.

434 **References**

- 435 (1) Reisner, A.; Maierl, M.; Jörger, M.; Krause, R.; Berger, D.; Haid, A.; Tesic, D.; Zechner, E. L.  
436 Type 1 Fimbriae Contribute to Catheter-Associated Urinary Tract Infections Caused by  
437 Escherichia Coli. *J. Bacteriol.* **2014**, *196* (5), 931–939. <https://doi.org/10.1128/JB.00985-13>.
- 438 (2) Shemesh, M.; Ostrov, I. Role of Bacillus Species in Biofilm Persistence and Emerging  
439 Antibiofilm Strategies in the Dairy Industry. *J. Sci. Food Agric.* **2020**, *100* (6), 2327–2336.  
440 <https://doi.org/10.1002/jsfa.10285>.
- 441 (3) Zhang, L.; Keller, J.; Yuan, Z. Inhibition of Sulfate-Reducing and Methanogenic Activities of  
442 Anaerobic Sewer Biofilms by Ferric Iron Dosing. *Water Res.* **2009**, *43* (17), 4123–4132.  
443 <https://doi.org/10.1016/j.watres.2009.06.013>.
- 444 (4) Zhang, C.; Huang, J.; Zhang, J.; Liu, S.; Cui, M.; An, B.; Wang, X.; Pu, J.; Zhao, T.; Fan, C.; Lu, T.  
445 K.; Zhong, C. Engineered Bacillus Subtilis Biofilms as Living Glues. *Mater. Today* **2019**, *28*  
446 (September), 40–48. <https://doi.org/10.1016/j.mattod.2018.12.039>.
- 447 (5) Duraj-Thatte, A. M.; Manjula-Basavanna, A.; Courchesne, N. M. D.; Cannici, G. I.; Sánchez-  
448 Ferrer, A.; Frank, B. P.; van't Hag, L.; Cotts, S. K.; Fairbrother, D. H.; Mezzenga, R.; Joshi, N. S.  
449 Water-Processable, Biodegradable and Coatable Aquaplastic from Engineered Biofilms. *Nat.*  
450 *Chem. Biol.* **2021**, *17* (6), 732–738. <https://doi.org/10.1038/s41589-021-00773-y>.
- 451 (6) Balasubramanian, S.; Aubin-Tam, M.-E.; Meyer, A. S. 3D Printing for the Fabrication of  
452 Biofilm-Based Functional Living Materials. *ACS Synth. Biol.* **2019**, *8* (7), 1564–1567.  
453 <https://doi.org/10.1021/acssynbio.9b00192>.
- 454 (7) Schaffner, M.; Rühls, P. A.; Coulter, F.; Kilcher, S.; Studart, A. R. 3D Printing of Bacteria into  
455 Functional Complex Materials. *Sci. Adv.* **2017**, *3* (12).  
456 <https://doi.org/10.1126/sciadv.aao6804>.
- 457 (8) Limoli, D. H.; Jones, C. J.; Wozniak, D. J. Bacterial Extracellular Polysaccharides in Biofilm  
458 Formation and Function. *Microbiol. Spectr.* **2015**, *3* (3), 1–30.  
459 <https://doi.org/10.1128/microbiolspec.mb-0011-2014>.



- 460 (9) Fong, J. N. C.; Yildiz, F. H. Bio Film Matrix Proteins. *Microbiol. Spectr* **2015**, *3*, 201–222.  
461 <https://doi.org/10.1128/microbiolspec>.
- 462 (10) Flemming, H.-C.; Wingender, J.; Szewzyk, U.; Steinberg, P.; Rice, S. A.; Kjelleberg, S. Biofilms:  
463 An Emergent Form of Bacterial Life. *Nat. Rev. Microbiol.* **2016**, *14* (9), 563–575.  
464 <https://doi.org/10.1038/nrmicro.2016.94>.
- 465 (11) Mann, E. E.; Wozniak, D. J. Pseudomonas Biofilm Matrix Composition and Niche Biology.  
466 *FEMS Microbiol. Rev.* **2012**, *36* (4), 893–916. [https://doi.org/10.1111/j.1574-](https://doi.org/10.1111/j.1574-6976.2011.00322.x)  
467 [6976.2011.00322.x](https://doi.org/10.1111/j.1574-6976.2011.00322.x).
- 468 (12) Erskine, E.; MacPhee, C. E.; Stanley-Wall, N. R. Functional Amyloid and Other Protein Fibers in  
469 the Biofilm Matrix. *J. Mol. Biol.* **2018**, *430* (20), 3642–3656.  
470 <https://doi.org/10.1016/j.jmb.2018.07.026>.
- 471 (13) Barnhart, M. M.; Chapman, M. R. Curli Biogenesis and Function. *Annu. Rev. Microbiol.* **2006**,  
472 *60* (1), 131–147. <https://doi.org/10.1146/annurev.micro.60.080805.142106>.
- 473 (14) Thongsomboon, W.; Serra, D. O.; Possling, A.; Hadjineophytou, C.; Hengge, R.; Cegelski, L.  
474 Phosphoethanolamine Cellulose: A Naturally Produced Chemically Modified Cellulose. *Science*  
475 *(80-. )*. **2018**, *359* (6373), 334–338. <https://doi.org/10.1126/science.aaa4096>.
- 476 (15) Jeffries, J.; Thongsomboon, W.; Visser, J. A.; Enriquez, K.; Yager, D.; Cegelski, L. Variation in  
477 the Ratio of Curli and Phosphoethanolamine Cellulose Associated with Biofilm Architecture  
478 and Properties. *Biopolymers* **2021**, *112* (1), 1–11. <https://doi.org/10.1002/bip.23395>.
- 479 (16) Ziege, R.; Tsigoni, A.-M.; Large, B.; Serra, D. O.; Blank, K. G.; Hengge, R.; Fratzl, P.; Bidan, C.  
480 M. Adaptation of Escherichia Coli Biofilm Growth, Morphology, and Mechanical Properties to  
481 Substrate Water Content. *ACS Biomater. Sci. Eng.* **2021**, *7* (11), 5315–5325.  
482 <https://doi.org/10.1021/acsbiomaterials.1c00927>.
- 483 (17) Rühls, P. A.; Böni, L.; Fuller, G. G.; Inglis, R. F.; Fischer, P. In-Situ Quantification of the  
484 Interfacial Rheological Response of Bacterial Biofilms to Environmental Stimuli. *PLoS One*  
485 **2013**, *8* (11), e78524. <https://doi.org/10.1371/journal.pone.0078524>.

- 486 (18) Degtyar, E.; Harrington, M. J.; Politi, Y.; Fratzl, P. The Mechanical Role of Metal Ions in  
487 Biogenic Protein-Based Materials. *Angew. Chemie Int. Ed.* **2014**, *53* (45), 12026–12044.  
488 <https://doi.org/10.1002/anie.201404272>.
- 489 (19) Ukmar-Godec, T. Mineralization of Goethite in Limpet Radular Teeth. In *Iron Oxides*; Faivre,  
490 D., Ed.; Wiley, 2016; pp 207–224. <https://doi.org/10.1002/9783527691395.ch9>.
- 491 (20) Chan, C. S.; Fakra, S. C.; Edwards, D. C.; Emerson, D.; Banfield, J. F. Iron Oxyhydroxide  
492 Mineralization on Microbial Extracellular Polysaccharides. *Geochim. Cosmochim. Acta* **2009**,  
493 *73* (13), 3807–3818. <https://doi.org/10.1016/j.gca.2009.02.036>.
- 494 (21) Fratzl, P.; Gupta, H. S.; Paschalis, E. P.; Roschger, P. Structure and Mechanical Quality of the  
495 Collagen–Mineral Nano-Composite in Bone. *J. Mater. Chem.* **2004**, *14* (14), 2115–2123.  
496 <https://doi.org/10.1039/B402005G>.
- 497 (22) Baumgartner, J.; Faivre, D. Magnetite Biomineralization in Bacteria. In *Progress in molecular*  
498 *and subcellular biology*; 2011; Vol. 52, pp 3–27. [https://doi.org/10.1007/978-3-642-21230-](https://doi.org/10.1007/978-3-642-21230-7_1)  
499 [7\\_1](https://doi.org/10.1007/978-3-642-21230-7_1).
- 500 (23) Jehle, F.; Fratzl, P.; Harrington, M. J. Metal-Tunable Self-Assembly of Hierarchical Structure in  
501 Mussel-Inspired Peptide Films. *ACS Nano* **2018**, *12* (3), 2160–2168.  
502 <https://doi.org/10.1021/acsnano.7b07905>.
- 503 (24) Khare, E.; Holten-Andersen, N.; Buehler, M. J. Transition-Metal Coordinate Bonds for  
504 Bioinspired Macromolecules with Tunable Mechanical Properties. *Nat. Rev. Mater.* **2021**, *6*  
505 (5), 421–436. <https://doi.org/10.1038/s41578-020-00270-z>.
- 506 (25) Mosharaf, M. K.; Tanvir, M. Z. H.; Haque, M. M.; Haque, M. A.; Khan, M. A. A.; Molla, A. H.;  
507 Alam, M. Z.; Islam, M. S.; Talukder, M. R. Metal-Adapted Bacteria Isolated from Wastewaters  
508 Produce Biofilms by Expressing Proteinaceous Curli Fimbriae and Cellulose Nanofibers. *Front.*  
509 *Microbiol.* **2018**, *9* (JUN), 1–17. <https://doi.org/10.3389/fmicb.2018.01334>.
- 510 (26) Tallawi, M.; Opitz, M.; Lieleg, O. Modulation of the Mechanical Properties of Bacterial  
511 Biofilms in Response to Environmental Challenges. *Biomater. Sci.* **2017**, *5* (5), 887–900.

- 512 <https://doi.org/10.1039/C6BM00832A>.
- 513 (27) Klotz, M.; Kretschmer, M.; Goetz, A.; Ezendam, S.; Lieleg, O.; Opitz, M. Importance of the  
514 Biofilm Matrix for the Erosion Stability of Bacillus Subtilis NCIB 3610 Biofilms. *RSC Adv.* **2019**,  
515 *9* (20), 11521–11529. <https://doi.org/10.1039/C9RA01955C>.
- 516 (28) Serra, D. O.; Richter, A. M.; Hengge, R. Cellulose as an Architectural Element in Spatially  
517 Structured Escherichia Coli Biofilms. *J. Bacteriol.* **2013**, *195* (24), 5540–5554.  
518 <https://doi.org/10.1128/JB.00946-13>.
- 519 (29) Hayashi, K.; Morooka, N.; Yamamoto, Y.; Fujita, K.; Isono, K.; Choi, S.; Ohtsubo, E.; Baba, T.;  
520 Wanner, B. L.; Mori, H.; Horiuchi, T. Highly Accurate Genome Sequences of Escherichia Coli K-  
521 12 Strains MG1655 and W3110. *Mol. Syst. Biol.* **2006**, *2* (1).  
522 <https://doi.org/10.1038/msb4100049>.
- 523 (30) Jubelin, G.; Vianney, A.; Beloin, C.; Ghigo, J.-M.; Lazzaroni, J.-C.; Lejeune, P.; Dorel, C.  
524 CpxR/OmpR Interplay Regulates Curli Gene Expression in Response to Osmolarity in  
525 Escherichia Coli. *J. Bacteriol.* **2005**, *187* (6), 2038–2049.  
526 <https://doi.org/10.1128/JB.187.6.2038-2049.2005>.
- 527 (31) Lieleg, O.; Caldara, M.; Baumgärtel, R.; Ribbeck, K. Mechanical Robustness of  
528 Pseudomonasaeruginosa Biofilms. *Soft Matter* **2011**, *7* (7), 3307.  
529 <https://doi.org/10.1039/c0sm01467b>.
- 530 (32) Stanley-Gray, J.; Zhang, Z.; Venkataraman, D. Updated Coordination Geometry Table of the D-  
531 Block Elements and Their Ions. *J. Chem. Educ.* **2021**, *98* (7), 2476–2481.  
532 <https://doi.org/10.1021/acs.jchemed.1c00364>.
- 533 (33) Bhardwaj, N. C.; Jadon, S. C. S.; Singh, R. V. Aluminium(III) Complexes with Usual and Unusual  
534 Coordination Numbers. *Synth. React. Inorg. Met. Chem.* **1994**, *24* (8), 1267–1279.  
535 <https://doi.org/10.1080/00945719408002143>.
- 536 (34) Katz, A. K.; Glusker, J. P.; Beebe, S. A.; Bock, C. W. Calcium Ion Coordination: A Comparison  
537 with That of Beryllium, Magnesium, and Zinc. *J. Am. Chem. Soc.* **1996**, *118* (24), 5752–5763.

- 538 <https://doi.org/10.1021/ja953943i>.
- 539 (35) Horvat, M.; Pannuri, A.; Romeo, T.; Dogsa, I.; Stopar, D. Viscoelastic Response of Escherichia  
540 Coli Biofilms to Genetically Altered Expression of Extracellular Matrix Components. *Soft*  
541 *Matter* **2019**, *15* (25), 5042–5051. <https://doi.org/10.1039/C9SM00297A>.
- 542 (36) Kretschmer, M.; Lieleg, O. Chelate Chemistry Governs Ion-Specific Stiffening of: Bacillus  
543 Subtilis B-1 and Azotobacter Vinelandii Biofilms. *Biomater. Sci.* **2020**, *8* (7), 1923–1933.  
544 <https://doi.org/10.1039/c9bm01763a>.
- 545 (37) Periasamy, S.; Nair, H. A. S.; Lee, K. W. K.; Ong, J.; Goh, J. Q. J.; Kjelleberg, S.; Rice, S. A.  
546 Pseudomonas Aeruginosa PAO1 Exopolysaccharides Are Important for Mixed Species Biofilm  
547 Community Development and Stress Tolerance. *Front. Microbiol.* **2015**, *6* (AUG), 1–10.  
548 <https://doi.org/10.3389/fmicb.2015.00851>.
- 549 (38) Li, W.-W.; Yu, H.-Q. Insight into the Roles of Microbial Extracellular Polymer Substances in  
550 Metal Biosorption. *Bioresour. Technol.* **2014**, *160*, 15–23.  
551 <https://doi.org/10.1016/j.biortech.2013.11.074>.
- 552 (39) Quintelas, C.; Rocha, Z.; Silva, B.; Fonseca, B.; Figueiredo, H.; Tavares, T. Removal of Cd(II),  
553 Cr(VI), Fe(III) and Ni(II) from Aqueous Solutions by an E. Coli Biofilm Supported on Kaolin.  
554 *Chem. Eng. J.* **2009**, *149* (1–3), 319–324. <https://doi.org/10.1016/j.cej.2008.11.025>.
- 555 (40) Božič, M.; Liu, P.; Mathew, A. P.; Kokol, V. Enzymatic Phosphorylation of Cellulose Nanofibers  
556 to New Highly-Ions Adsorbing, Flame-Retardant and Hydroxyapatite-Growth Induced Natural  
557 Nanoparticles. *Cellulose* **2014**, *21* (4), 2713–2726. [https://doi.org/10.1007/s10570-014-0281-](https://doi.org/10.1007/s10570-014-0281-8)  
558 [8](https://doi.org/10.1007/s10570-014-0281-8).
- 559 (41) Oshima, T.; Kondo, K.; Ohto, K.; Inoue, K.; Baba, Y. Preparation of Phosphorylated Bacterial  
560 Cellulose as an Adsorbent for Metal Ions. *React. Funct. Polym.* **2008**, *68* (1), 376–383.  
561 <https://doi.org/10.1016/j.reactfunctpolym.2007.07.046>.
- 562 (42) Hosny, W. M.; Basta, A. H.; El-Saied, H. *Metal Chelates with Some Cellulose Derivatives:*  
563 *Synthesis and V. Characterization of Some Iron(III) Complexes with Cellulose Ethers*; 1997; Vol.

- 564 42.
- 565 (43) Hidalgo, G.; Chen, X.; Hay, A. G.; Lion, L. W. Curli Produced by Escherichia Coli Phl628 Provide  
566 Protection from Hg(II). *Appl. Environ. Microbiol.* **2010**, *76* (20), 6939–6941.  
567 <https://doi.org/10.1128/AEM.01254-10>.
- 568 (44) House, E.; Collingwood, J.; Khan, A.; Korchazkina, O.; Berthon, G.; Exley, C. Aluminium, Iron,  
569 Zinc and Copper Influence the in Vitro Formation of Amyloid Fibrils of A $\beta$ 42 in a Manner  
570 Which May Have Consequences for Metal Chelation Therapy in Alzheimer’s Disease. *J.*  
571 *Alzheimer’s Dis.* **2004**, *6* (3), 291–301. <https://doi.org/10.3233/JAD-2004-6310>.
- 572 (45) Mujika, J. I.; Rodríguez-Guerra Pedregal, J.; Lopez, X.; Ugalde, J. M.; Rodríguez-Santiago, L.;  
573 Sodupe, M.; Maréchal, J.-D. Elucidating the 3D Structures of Al(III)–A $\beta$  Complexes: A Template  
574 Free Strategy Based on the Pre-Organization Hypothesis. *Chem. Sci.* **2017**, *8* (7), 5041–5049.  
575 <https://doi.org/10.1039/C7SC01296A>.
- 576 (46) Faller, P.; Hureau, C. Bioinorganic Chemistry of Copper and Zinc Ions Coordinated to Amyloid- $\beta$   
577 Peptide. *Dalt. Trans.* **2009**, No. 7, 1080–1094. <https://doi.org/10.1039/B813398K>.
- 578 (47) Hureau, C. Coordination of Redox Active Metal Ions to the Amyloid Precursor Protein and to  
579 Amyloid- $\beta$  Peptides Involved in Alzheimer Disease. Part 1: An Overview. *Coord. Chem. Rev.*  
580 **2012**, *256* (19–20), 2164–2174. <https://doi.org/10.1016/j.ccr.2012.03.037>.
- 581 (48) Nair, N. G.; Perry, G.; Smith, M. A.; Reddy, V. P. NMR Studies of Zinc, Copper, and Iron Binding  
582 to Histidine, the Principal Metal Ion Complexing Site of Amyloid- $\beta$  Peptide. *J. Alzheimer’s Dis.*  
583 **2010**, *20* (1), 57–66. <https://doi.org/10.3233/JAD-2010-1346>.
- 584 (49) Jumper, J.; Evans, R.; Pritzel, A.; Green, T.; Figurnov, M.; Ronneberger, O.; Tunyasuvunakool,  
585 K.; Bates, R.; Žídek, A.; Potapenko, A.; Bridgland, A.; Meyer, C.; Kohl, S. A. A.; Ballard, A. J.;  
586 Cowie, A.; Romera-Paredes, B.; Nikolov, S.; Jain, R.; Adler, J.; Back, T.; Petersen, S.; Reiman,  
587 D.; Clancy, E.; Zielinski, M.; Steinegger, M.; Pacholska, M.; Berghammer, T.; Bodenstein, S.;  
588 Silver, D.; Vinyals, O.; Senior, A. W.; Kavukcuoglu, K.; Kohli, P.; Hassabis, D. Highly Accurate  
589 Protein Structure Prediction with AlphaFold. *Nature* **2021**, *596* (7873), 583–589.

- 590 <https://doi.org/10.1038/s41586-021-03819-2>.
- 591 (50) Varadi, M.; Anyango, S.; Deshpande, M.; Nair, S.; Natassia, C.; Yordanova, G.; Yuan, D.; Stroe,  
592 O.; Wood, G.; Laydon, A.; Židek, A.; Green, T.; Tunyasuvunakool, K.; Petersen, S.; Jumper, J.;  
593 Clancy, E.; Green, R.; Vora, A.; Lutfi, M.; Figurnov, M.; Cowie, A.; Hobbs, N.; Kohli, P.;  
594 Kleywegt, G.; Birney, E.; Hassabis, D.; Velankar, S. AlphaFold Protein Structure Database:  
595 Massively Expanding the Structural Coverage of Protein-Sequence Space with High-Accuracy  
596 Models. *Nucleic Acids Res.* **2022**, *50* (D1), D439–D444.  
597 <https://doi.org/10.1093/nar/gkab1061>.
- 598 (51) Deng, C.; Li, X.; Xue, X.; Pashley, R. M. The Effects of Low Levels of Trivalent Ions on a  
599 Standard Strain of Escherichia Coli (ATCC 11775) in Aqueous Solutions. *Microbiologyopen*  
600 **2018**, *7* (3), e00574. <https://doi.org/10.1002/mbo3.574>.
- 601 (52) Teitzel, G. M.; Parsek, M. R. Heavy Metal Resistance of Biofilm and Planktonic *Pseudomonas*  
602 *Aeruginosa*. *Appl. Environ. Microbiol.* **2003**, *69* (4), 2313–2320.  
603 <https://doi.org/10.1128/AEM.69.4.2313-2320.2003>.
- 604
- 605
